# Supplementary figures and images for: Chitosan/Calcium-Coated Ginsenoside Rb1 Phosphate Flower-like Microparticles as an Adjuvant to Enhance Immune Responses
Source: MDPI journal article supplement (doi:10.3390/vetsci9070355), 2022-07-13

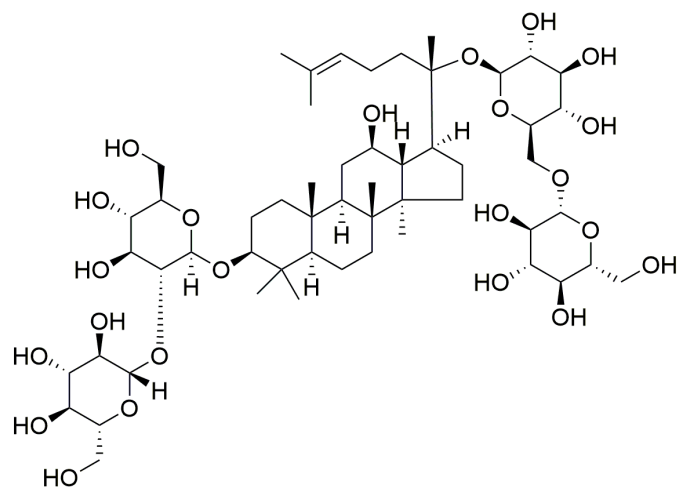

Supplement Figure S1. GRb1 chemical structural formula.

Supplement: s1 [file s1]
